# Supplementary material for: Age-standardized incidence, mortality rate, and trend changes of thyroid cancer in the Balearic Islands during the 2000–2020 period: a population-based study
Source: PubMed Central journal article supplement (PMC10160559; doi:10.1530/etj-22-0183), 2023-04-21

## Supplementary Material

Table S1. Crude Incidence and Mean Age at Diagnosis for Thyroid Cancer during the 2000-2020 Period in the Balearic Islands Public Health Records.

| Year | Population* | Incident Cases, n | Percent | Crude Incidence, (x100.000) | Mean Age at Diagnosis, years |
|------|-------------|-------------------|---------|-----------------------------|------------------------------|
| 2000 | 830.428     | 25                | 1,80%   | 3,01                        | 45,32                        |
| 2001 | 845.130     | 23                | 1,66%   | 2,72                        | 49,43                        |
| 2002 | 883.410     | 30                | 2,16%   | 3,40                        | 46,81                        |
| 2003 | 912.964     | 25                | 1,80%   | 2,74                        | 46,29                        |
| 2004 | 940.124     | 35                | 2,52%   | 3,72                        | 47,54                        |
| 2005 | 970.288     | 31                | 2,24%   | 3,19                        | 42,78                        |
| 2006 | 1.005.184   | 37                | 2,67%   | 3,68                        | 52,26                        |
| 2007 | 1.042.855   | 37                | 2,67%   | 3,55                        | 46,43                        |
| 2008 | 1.070.164   | 40                | 2,88%   | 3,74                        | 49,65                        |
| 2009 | 1.083.683   | 41                | 2,96%   | 3,78                        | 46,75                        |
| 2010 | 1.091.656   | 55                | 3,97%   | 5,04                        | 48,07                        |
| 2011 | 1.100.715   | 65                | 4,69%   | 5,91                        | 53,09                        |
| 2012 | 1.110.115   | 92                | 6,63%   | 8,29                        | 47,63                        |
| 2013 | 1.115.841   | 102               | 7,35%   | 9,14                        | 52,19                        |
| 2014 | 1.124.972   | 108               | 7,79%   | 9,60                        | 53,61                        |
| 2015 | 1.135.527   | 108               | 7,79%   | 9,51                        | 52,32                        |
| 2016 | 1.150.935   | 93                | 6,71%   | 8,08                        | 57,49                        |
| 2017 | 1.166.923   | 112               | 8,07%   | 9,60                        | 52,54                        |
| 2018 | 1.188.220   | 90                | 6,49%   | 7,57                        | 53,26                        |
| 2019 | 1.210.725   | 108               | 7,79%   | 8,92                        | 51,66                        |
| 2020 | 1.219.423   | 130               | 9,37%   | 10,66                       | 45,32                        |

\*Source: National Institute of Statistics at <https://ine.es/jaxiT3/Tabla.htm?t=31304>. Accessed 31/08/2022.

Table S2. Crude Incidence and Mean Age at Diagnosis for Thyroid Cancer in Female Population during the 2000-2020 Period.

| Year | Population* | Incident Cases, n | Percent vs Male Population | Crude Incidence, (x100.000) | Mean Age at Diagnosis, years |
|------|-------------|-------------------|----------------------------|-----------------------------|------------------------------|
| 2000 | 418.868     | 20                | 80,00%                     | 4,77                        | 50,25                        |
| 2001 | 425.993     | 15                | 65,22%                     | 3,52                        | 46,80                        |
| 2002 | 444.000     | 26                | 86,67%                     | 5,86                        | 48,08                        |
| 2003 | 458.415     | 21                | 84,00%                     | 4,58                        | 47,48                        |
| 2004 | 471.245     | 31                | 88,57%                     | 6,58                        | 46,68                        |
| 2005 | 485.509     | 21                | 67,74%                     | 4,33                        | 45,06                        |
| 2006 | 501.617     | 25                | 67,57%                     | 4,98                        | 49,54                        |
| 2007 | 518.832     | 30                | 81,08%                     | 5,78                        | 46,37                        |
| 2008 | 531.524     | 33                | 82,50%                     | 6,21                        | 48,63                        |
| 2009 | 538.545     | 31                | 75,61%                     | 5,76                        | 45,03                        |
| 2010 | 543.069     | 41                | 74,55%                     | 7,55                        | 46,85                        |
| 2011 | 548.122     | 55                | 84,62%                     | 10,03                       | 51,16                        |
| 2012 | 553.557     | 82                | 89,13%                     | 14,81                       | 46,69                        |
| 2013 | 557.211     | 73                | 71,57%                     | 13,10                       | 52,52                        |
| 2014 | 562.431     | 85                | 78,70%                     | 15,11                       | 53,63                        |
| 2015 | 567.982     | 87                | 80,56%                     | 15,32                       | 52,24                        |
| 2016 | 575.631     | 72                | 77,42%                     | 12,51                       | 55,55                        |
| 2017 | 583.467     | 79                | 70,54%                     | 13,54                       | 51,42                        |
| 2018 | 593.797     | 68                | 75,56%                     | 11,45                       | 52,09                        |
| 2019 | 604.862     | 85                | 78,70%                     | 14,05                       | 51,03                        |
| 2020 | 609.611     | 94                | 72,31%                     | 15,42                       | 50,30                        |

\*Source: National Institute of Statistics at <https://ine.es/jaxiT3/Tabla.htm?t=31304>. Accessed 31/08/2022.

Table S3. Crude Incidence and Mean Age at Diagnosis for Thyroid Cancer in Male Population during the 2000-2020 Period.

| Year | Population* | Incident Cases, n | Percent | Crude Incidence, (x100.000) | Mean Age at Diagnosis, years |
|------|-------------|-------------------|---------|-----------------------------|------------------------------|
| 2000 | 411.560     | 5                 | 20,00%  | 1,21                        | 34,60                        |
| 2001 | 419.137     | 8                 | 34,78%  | 1,91                        | 56,50                        |
| 2002 | 439.410     | 4                 | 13,33%  | 0,91                        | 49,75                        |
| 2003 | 454.549     | 4                 | 16,00%  | 0,88                        | 51,00                        |
| 2004 | 468.878     | 4                 | 11,43%  | 0,85                        | 54,25                        |
| 2005 | 484.779     | 10                | 32,26%  | 2,06                        | 38,22                        |
| 2006 | 503.568     | 12                | 32,43%  | 2,38                        | 58,80                        |
| 2007 | 524.023     | 7                 | 18,92%  | 1,34                        | 46,71                        |
| 2008 | 538.640     | 7                 | 17,50%  | 1,30                        | 54,42                        |
| 2009 | 545.138     | 10                | 24,39%  | 1,83                        | 52,10                        |
| 2010 | 548.586     | 14                | 25,45%  | 2,55                        | 51,64                        |
| 2011 | 552.593     | 10                | 15,38%  | 1,81                        | 63,70                        |
| 2012 | 556.558     | 10                | 10,87%  | 1,80                        | 55,30                        |
| 2013 | 558.631     | 29                | 28,43%  | 5,19                        | 51,37                        |
| 2014 | 562.541     | 23                | 21,30%  | 4,09                        | 53,52                        |
| 2015 | 567.545     | 21                | 19,44%  | 3,70                        | 52,66                        |
| 2016 | 575.304     | 21                | 22,58%  | 3,65                        | 64,14                        |
| 2017 | 583.456     | 33                | 29,46%  | 5,66                        | 55,27                        |
| 2018 | 594.424     | 22                | 24,44%  | 3,70                        | 57,09                        |
| 2019 | 605.863     | 23                | 21,30%  | 3,80                        | 53,95                        |
| 2020 | 609.812     | 36                | 27,69%  | 5,90                        | 54,27                        |

\*Source: National Institute of Statistics at <https://ine.es/jaxiT3/Tabla.htm?t=31304>. Accessed 31/08/2022.

Table S4. Incident Mortality by Mortality Groups in Patients with Thyroid Cancer in the Balearic Islands during the 2000-2020 period.

| Year | Disease-specific | Other Causes | 2 <sup>nd</sup> Neoplasia | Total Incident Cases | Cumulative Disease-specific Mortality Rate <sup>1</sup> (%) |
|------|------------------|--------------|---------------------------|----------------------|-------------------------------------------------------------|
| 2000 | 2                | 1            | 1                         | 25                   | 0,080                                                       |
| 2001 | 1                | 3            | 1                         | 23                   | 0,063                                                       |
| 2002 | 2                | 3            | 0                         | 30                   | 0,064                                                       |
| 2003 | 1                | 4            | 1                         | 25                   | 0,058                                                       |
| 2004 | 3                | 4            | 0                         | 35                   | 0,065                                                       |
| 2005 | 2                | 2            | 2                         | 31                   | 0,065                                                       |
| 2006 | 4                | 2            | 2                         | 37                   | 0,073                                                       |
| 2007 | 2                | 1            | 1                         | 37                   | 0,070                                                       |
| 2008 | 2                | 2            | 2                         | 40                   | 0,067                                                       |
| 2009 | 1                | 3            | 0                         | 41                   | 0,062                                                       |
| 2010 | 2                | 3            | 1                         | 55                   | 0,058                                                       |
| 2011 | 2                | 1            | 2                         | 65                   | 0,054                                                       |
| 2012 | 3                | 2            | 2                         | 92                   | 0,050                                                       |
| 2013 | 3                | 6            | 0                         | 102                  | 0,047                                                       |
| 2014 | 1                | 1            | 2                         | 108                  | 0,042                                                       |
| 2015 | 2                | 3            | 2                         | 108                  | 0,039                                                       |
| 2016 | 5                | 2            | 2                         | 93                   | 0,040                                                       |
| 2017 | 4                | 1            | 3                         | 112                  | 0,040                                                       |
| 2018 | 2                | 2            | 1                         | 90                   | 0,038                                                       |
| 2019 | 2                | 5            | 2                         | 108                  | 0,037                                                       |
| 2020 | 0                | 2            | 2                         | 130                  | 0,033                                                       |

<sup>1</sup> Cumulative Mortality rate expressed as percent value (%) of total cohort.

Table S5. Disease-specific Population-based and Cumulative Mortality Rate in Patients with Thyroid Cancer in the Balearic Islands during the 2000-2020 period.

| Year | Disease-specific Mortality Incident Cases | Balearic Islands Population | Population-based Mortality Rate ( $\times 10^5$ ) | Total Incident Cases | Cumulative Disease-specific Mortality Rate <sup>†</sup> (%) |
|------|-------------------------------------------|-----------------------------|---------------------------------------------------|----------------------|-------------------------------------------------------------|
| 2000 | 2                                         | 830,428                     | 0.24                                              | 25                   | 0,080                                                       |
| 2001 | 1                                         | 845,130                     | 0.12                                              | 23                   | 0,063                                                       |
| 2002 | 2                                         | 883,410                     | 0.23                                              | 30                   | 0,064                                                       |
| 2003 | 1                                         | 912,964                     | 0.11                                              | 25                   | 0,058                                                       |
| 2004 | 3                                         | 940,124                     | 0.32                                              | 35                   | 0,065                                                       |
| 2005 | 2                                         | 970,288                     | 0.21                                              | 31                   | 0,065                                                       |
| 2006 | 4                                         | 1,005,184                   | 0.40                                              | 37                   | 0,073                                                       |
| 2007 | 2                                         | 1,042,855                   | 0.19                                              | 37                   | 0,070                                                       |
| 2008 | 2                                         | 1,070,164                   | 0.19                                              | 40                   | 0,067                                                       |
| 2009 | 1                                         | 1,083,683                   | 0.09                                              | 41                   | 0,062                                                       |
| 2010 | 2                                         | 1,091,656                   | 0.18                                              | 55                   | 0,058                                                       |
| 2011 | 2                                         | 1,100,715                   | 0.18                                              | 65                   | 0,054                                                       |
| 2012 | 3                                         | 1,110,115                   | 0.27                                              | 92                   | 0,050                                                       |
| 2013 | 3                                         | 1,115,841                   | 0.27                                              | 102                  | 0,047                                                       |
| 2014 | 1                                         | 1,124,972                   | 0.09                                              | 108                  | 0,042                                                       |
| 2015 | 2                                         | 1,135,527                   | 0.18                                              | 108                  | 0,039                                                       |
| 2016 | 5                                         | 1,150,935                   | 0.43                                              | 93                   | 0,040                                                       |
| 2017 | 4                                         | 1,166,923                   | 0.34                                              | 112                  | 0,040                                                       |
| 2018 | 2                                         | 1,188,220                   | 0.17                                              | 90                   | 0,038                                                       |
| 2019 | 2                                         | 1,210,725                   | 0.17                                              | 108                  | 0,037                                                       |
| 2020 | 0                                         | 1,219,423                   | 0                                                 | 130                  | 0,033                                                       |

<sup>†</sup> Cumulative Mortality rate expressed as percent value (%) of total cohort.

Figure S1) Gender-specific and S2) Incident Cases Age Distribution of Patients with Thyroid Cancer during the 2000-2020 Period in the Balearic Islands,

S1)

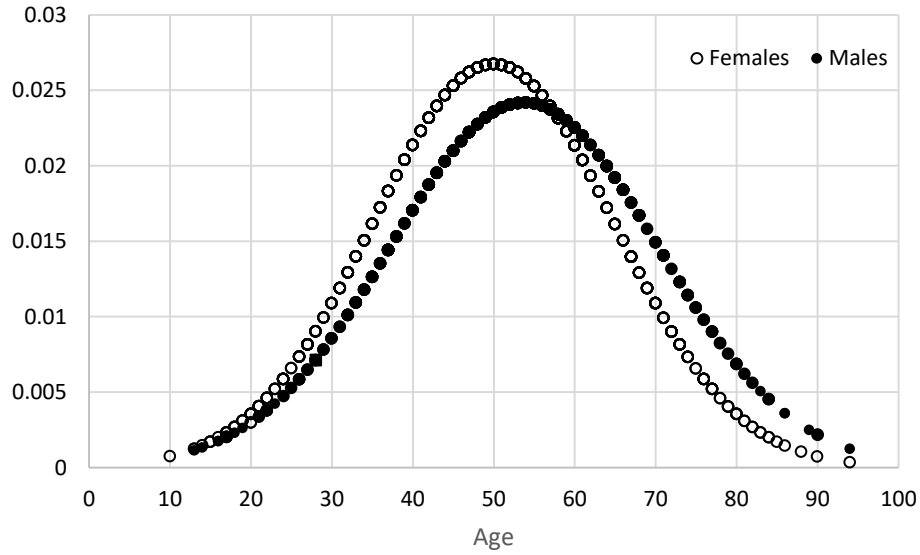

S2)

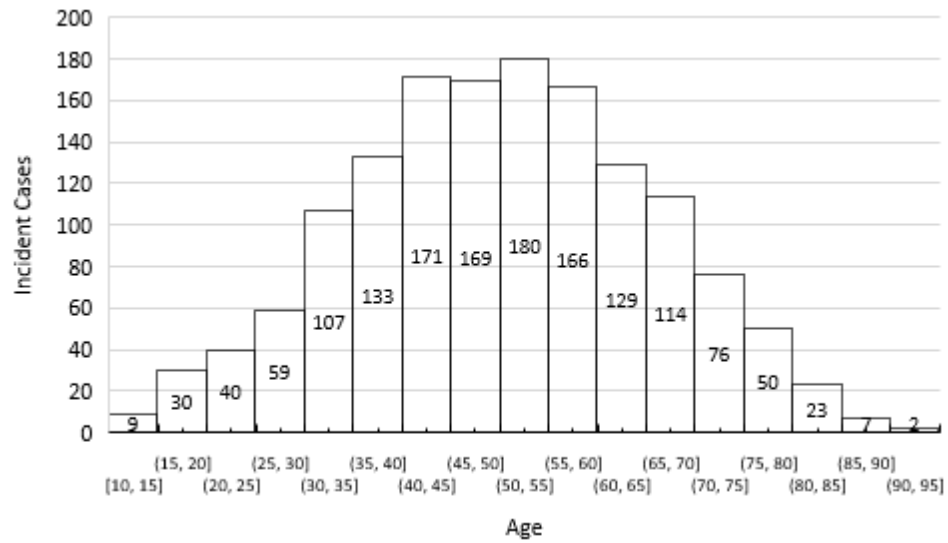

Supplement: supplementary_material.pdf [file supplementary_material.pdf]
